# Supplementary material
Source: PubMed Central journal article supplement (PMC3321066)
Supplement: NIHMS359589-supplement-01.pdf [file NIHMS359589-supplement-01.pdf]

eTable 1: Coffee consumption and time to pregnancy by age at study entry, smoking status, menstrual cycle regularity, number of cycle attempts before study entry, and parity<sup>a</sup>

|                                   | None | <1               | Coffee (servings/day) |                  |                  |
|-----------------------------------|------|------------------|-----------------------|------------------|------------------|
|                                   |      |                  | 1                     | 2                | 3+               |
| Age at baseline                   |      |                  |                       |                  |                  |
| <30                               | 1.00 | 1.07 (0.94-1.23) | 1.19 (1.00-1.41)      | 1.14 (0.89-1.45) | 1.36 (0.99-1.88) |
| 30+                               | 1.00 | 0.96 (0.79-1.16) | 0.97 (0.79-1.21)      | 1.07 (0.84-1.36) | 0.84 (0.60-1.18) |
| Smoking status                    |      |                  |                       |                  |                  |
| <i>Never</i>                      | 1.00 | 1.01 (0.88-1.16) | 1.12 (0.94-1.34)      | 1.08 (0.84-1.38) | 0.83 (0.55-1.23) |
| <i>Ever</i>                       | 1.00 | 1.06 (0.88-1.28) | 1.04 (0.84-1.28)      | 1.12 (0.88-1.42) | 1.16 (0.86-1.57) |
| Regular cycles                    |      |                  |                       |                  |                  |
| <i>Yes</i>                        | 1.00 | 1.04 (0.91-1.17) | 1.02 (0.87-1.19)      | 1.02 (0.84-1.23) | 1.04 (0.80-1.34) |
| <i>No</i>                         | 1.00 | 0.98 (0.77-1.25) | 1.30 (0.97-1.72)      | 1.48 (1.02-2.14) | 1.18 (0.67-2.09) |
| Cycle attempts before study entry |      |                  |                       |                  |                  |
| ≤2                                | 1.00 | 1.05 (0.93-1.20) | 1.08 (0.93-1.27)      | 1.15 (0.95-1.40) | 1.12 (0.85-1.46) |
| 3-6                               | 1.00 | 0.93 (0.75-1.16) | 1.10 (0.84-1.44)      | 0.98 (0.70-1.38) | 0.87 (0.54-1.40) |
| Parity                            |      |                  |                       |                  |                  |
| <i>Nulliparous</i>                | 1.00 | 1.05 (0.92-1.20) | 1.11 (0.94-1.32)      | 1.07 (0.84-1.35) | 1.23 (0.88-1.72) |
| <i>Parous</i>                     | 1.00 | 1.00 (0.82-1.22) | 1.05 (0.83-1.31)      | 1.04 (0.81-1.33) | 0.85 (0.61-1.18) |
| Alcohol consumption               |      |                  |                       |                  |                  |
| <3 drinks/week                    | 1.00 | 1.03 (0.90-1.19) | 1.11 (0.93-1.33)      | 1.16 (0.92-1.46) | 0.94 (0.67-1.31) |
| 3+ drinks/week                    | 1.00 | 1.02 (0.84-1.27) | 1.07 (0.86-1.32)      | 1.09 (0.84-1.41) | 1.19 (0.85-1.66) |

<sup>a</sup> Adjusted for age, partner age, body mass index, pack years of smoking, alcohol (drinks/week), frequency of intercourse, physical activity (mets/week) and consumption of tea and colas.

eTable 2: Tea consumption and time to pregnancy by age at study entry, smoking status, menstrual cycle regularity, number of cycle attempts before study entry, and parity<sup>a</sup>

| Characteristic                    | None | Tea (servings/day) |                  |                  |
|-----------------------------------|------|--------------------|------------------|------------------|
|                                   |      | <1                 | 1                | 2+               |
| Age at baseline                   |      |                    |                  |                  |
| <30                               | 1.00 | 1.04 (0.92-1.17)   | 1.11 (0.88-1.40) | 1.23 (0.83-1.83) |
| 30+                               | 1.00 | 1.27 (1.08-1.50)   | 0.98 (0.75-1.29) | 1.27 (0.90-1.78) |
| Smoking status                    |      |                    |                  |                  |
| <i>Never</i>                      | 1.00 | 1.09 (0.97-1.23)   | 1.09 (0.88-1.36) | 1.18 (0.84-1.66) |
| <i>Ever</i>                       | 1.00 | 1.14 (0.98-1.33)   | 0.97 (0.72-1.30) | 1.40 (0.95-2.07) |
| Regular cycles                    |      |                    |                  |                  |
| <i>Yes</i>                        | 1.00 | 1.13 (1.02-1.26)   | 1.00 (0.82-1.22) | 1.18 (0.88-1.57) |
| <i>No</i>                         | 1.00 | 1.03 (0.84-1.27)   | 1.12 (0.77-1.64) | 1.81 (1.02-3.21) |
| Cycle attempts before study entry |      |                    |                  |                  |
| ≤2                                | 1.00 | 1.10 (0.98-1.23)   | 0.93 (0.76-1.14) | 1.22 (0.91-1.64) |
| 3-6                               | 1.00 | 1.12 (0.93-1.36)   | 1.40 (0.98-2.00) | 1.48 (0.89-2.46) |
| Parity                            |      |                    |                  |                  |
| <i>Nulliparous</i>                | 1.00 | 1.13 (1.01-1.27)   | 1.03 (0.82-1.30) | 1.41 (1.00-1.99) |
| <i>Parous</i>                     | 1.00 | 1.17 (0.99-1.38)   | 1.03 (0.77-1.37) | 1.10 (0.75-1.62) |
| Alcohol consumption               |      |                    |                  |                  |
| <3 drinks/week                    | 1.00 | 1.12 (0.99-1.26)   | 1.02 (0.80-1.29) | 1.17 (0.83-1.67) |
| 3+ drinks/week                    | 1.00 | 1.09 (0.94-1.28)   | 1.07 (0.82-1.40) | 1.42 (0.97-2.07) |

a Adjusted for age, partner age, body mass index, pack years of smoking, alcohol (drinks/week), frequency of intercourse, physical activity (mets/week) and consumption of coffee and colas.

eTable 3: Total soda consumption and time to pregnancy by age at study entry, smoking status, menstrual cycle regularity, number of cycle attempts before study entry, and parity<sup>a</sup>

| Characteristic                    | Sodas (servings/day) |                  |                  |                  |
|-----------------------------------|----------------------|------------------|------------------|------------------|
|                                   | None                 | <1               | 1                | 2+               |
| Age at baseline                   |                      |                  |                  |                  |
| <30                               | 1.00                 | 0.91 (0.80-1.04) | 0.83 (0.66-1.06) | 0.81 (0.52-1.25) |
| 30+                               | 1.00                 | 0.86 (0.73-1.01) | 0.86 (0.64-1.16) | 0.54 (0.28-1.04) |
| Smoking status                    |                      |                  |                  |                  |
| <i>Never</i>                      | 1.00                 | 0.93 (0.82-1.06) | 0.87 (0.68-1.11) | 0.72 (0.43-1.22) |
| <i>Ever</i>                       | 1.00                 | 0.83 (0.70-0.98) | 0.83 (0.63-1.09) | 0.75 (0.46-1.25) |
| Regular cycles                    |                      |                  |                  |                  |
| <i>Yes</i>                        | 1.00                 | 0.90 (0.80-1.01) | 0.84 (0.68-1.03) | 0.71 (0.47-1.08) |
| <i>No</i>                         | 1.00                 | 0.90 (0.72-1.12) | 0.92 (0.62-1.37) | 0.92 (0.42-2.02) |
| Cycle attempts before study entry |                      |                  |                  |                  |
| ≤2                                | 1.00                 | 0.90 (0.80-1.01) | 0.87 (0.70-1.07) | 0.64 (0.41-1.00) |
| 3-6                               | 1.00                 | 0.88 (0.72-1.08) | 0.81 (0.56-1.19) | 0.97 (0.52-1.83) |
| Parity                            |                      |                  |                  |                  |
| <i>Nulliparous</i>                | 1.00                 | 0.91 (0.80-1.03) | 0.94 (0.75-1.19) | 0.62 (0.38-1.00) |
| <i>Parous</i>                     | 1.00                 | 0.83 (0.70-0.99) | 0.65 (0.48-0.88) | 0.93 (0.53-1.61) |
| Alcohol consumption               |                      |                  |                  |                  |
| <3 <i>drinks/week</i>             | 1.00                 | 0.93 (0.82-1.06) | 0.88 (0.70-1.11) | 0.80 (0.51-1.24) |
| 3+ <i>drinks/week</i>             | 1.00                 | 0.83 (0.69-0.99) | 0.81 (0.59-1.11) | 0.61 (0.32-1.17) |

a Adjusted for age, partner age, body mass index, pack years of smoking, alcohol (drinks/week), frequency of intercourse, physical activity (mets/week), and caffeine consumption.
